# Supplementary material
Source: PubMed Central journal article supplement (PMC548966)

**A**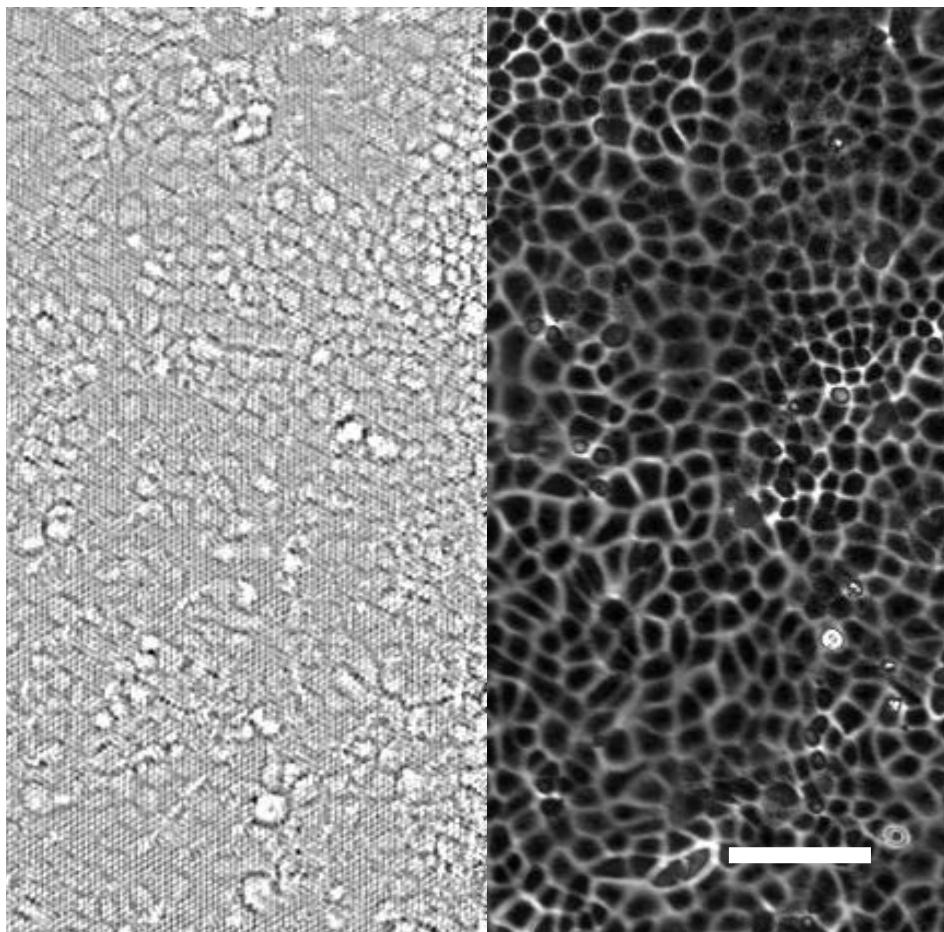**B**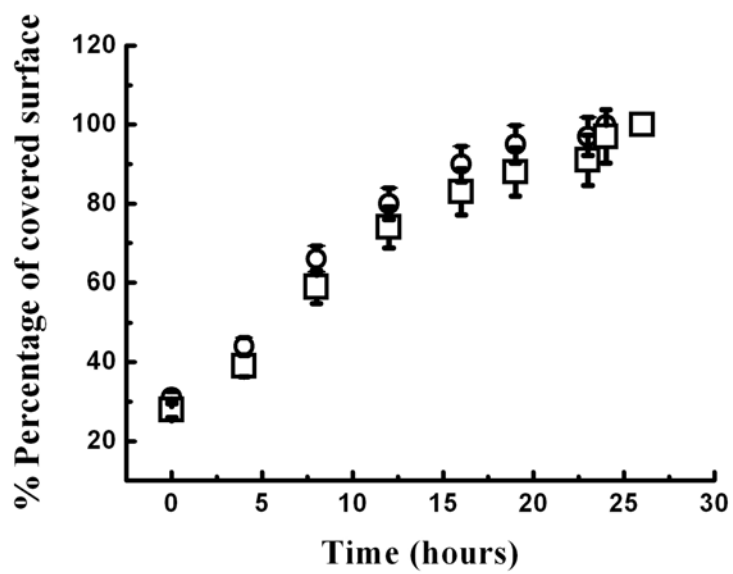

Supplement: pnas_102_7_2390__1.pdf [file pnas_102_7_2390__1.pdf]

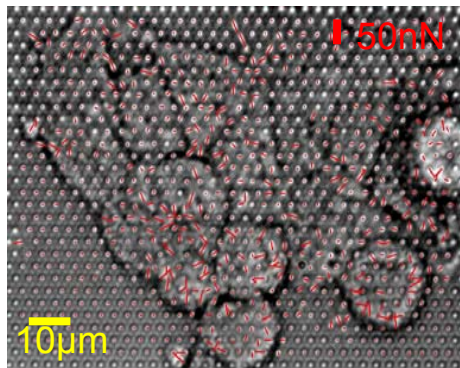

t=0

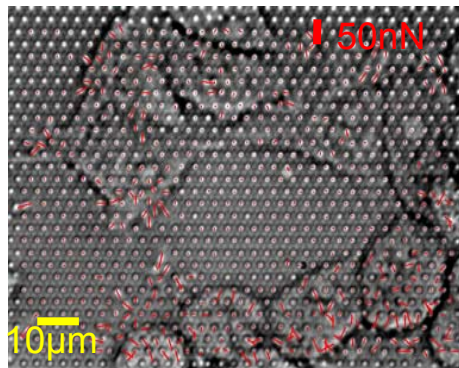

t=5H30

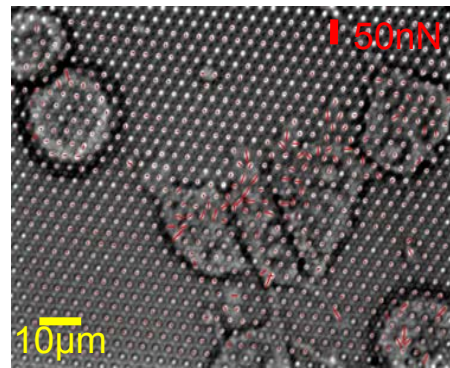

t=14H

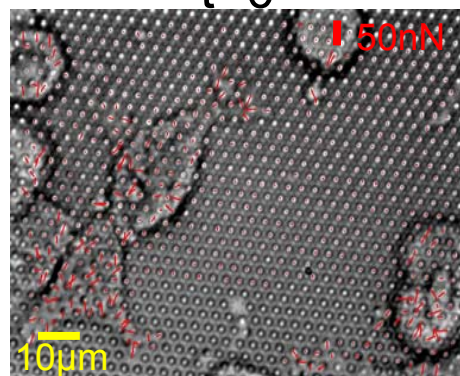

t=15H

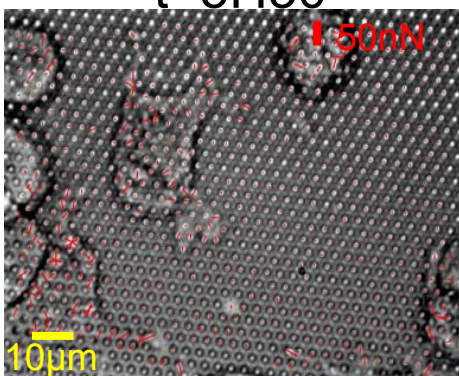

t=15H10

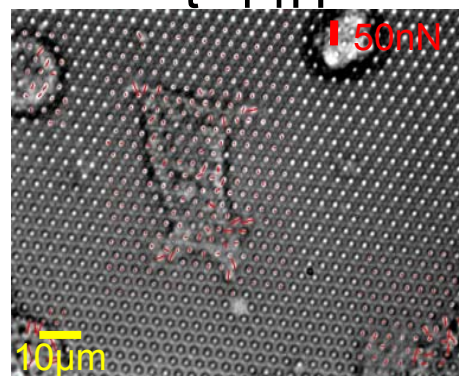

t=15H20

Supplement: pnas_102_7_2390__2.pdf [file pnas_102_7_2390__2.pdf]
